# Supplementary material for: In situ or Ex situ Synthesis for Electrochemical Detection of Hydrogen Peroxide—An Evaluation of Co2SnO4/RGO Nanohybrids
Source: MDPI journal article supplement (doi:10.3390/mi14051059), 2023-05-17
Supplement: s1 [file s1]

## Supplementary information

Article

# *In situ* or *Ex situ* Synthesis for Electrochemical Detection of Hydrogen Peroxide—An Evaluation of Co<sub>2</sub>SnO<sub>4</sub>/RGO Nanohybrids

Constanza J. Venegas <sup>1</sup>, Fabiana A. Gutierrez <sup>2,3</sup>, Nik Reeves-McLaren <sup>4</sup>, Gustavo A. Rivas <sup>5</sup>, Domingo Ruiz-León <sup>6,\*</sup> and Soledad Bollo <sup>7,8,\*</sup>

<sup>1</sup> Programa Institucional de Fomento a la Investigación, Desarrollo e Innovación, Universidad Tecnológica Metropolitana, Ignacio Valdivieso 2409, P.O. Box 8940577, San Joaquín 8320000, Santiago, Chile

<sup>2</sup> Laboratorio de Desarrollo Analítico y Quimiometría (LADAQ), Cátedra de Química Analítica I, Facultad de Bioquímica y Ciencias Biológicas, Universidad Nacional del Litoral, Ciudad Universitaria, Santa Fe 3000, Argentina

<sup>3</sup> Consejo Nacional de Investigaciones Científicas y Técnicas (CONICET), Godoy Cruz CP C1425FQB, Buenos Aires 2290, Argentina

<sup>4</sup> Department of Materials Science and Engineering, University of Sheffield, Sheffield S1 3JD, UK

<sup>5</sup> Instituto de Investigaciones en Físico-Química de Córdoba (INFIQC), Departamento de Físicoquímica, Facultad de Ciencias Químicas, Universidad Nacional de Córdoba, Ciudad Universitaria, Córdoba 5000, Argentina

<sup>6</sup> Laboratorio de Físicoquímica y Electroquímica del Estado Sólido, Facultad de Química y Biología, Universidad de Santiago de Chile, Av. Libertador Bernardo O'Higgins n° 3363, Santiago 9160000, Chile

<sup>7</sup> Centro de Investigación de Procesos Redox (CiPRex), Universidad de Chile, Sergio Livingstone Polhammer 1007, Independencia 8330015, Santiago, Chile

<sup>8</sup> Advanced Center for Chronic Diseases (ACCDiS), Universidad de Chile, Sergio Livingstone Polhammer 1007, Independencia 8330015, Santiago, Chile

\* Correspondence: domingo.ruiz@usach.cl (D.R.-L.); sbollo@ciq.uchile.cl (S.B.)

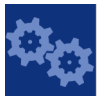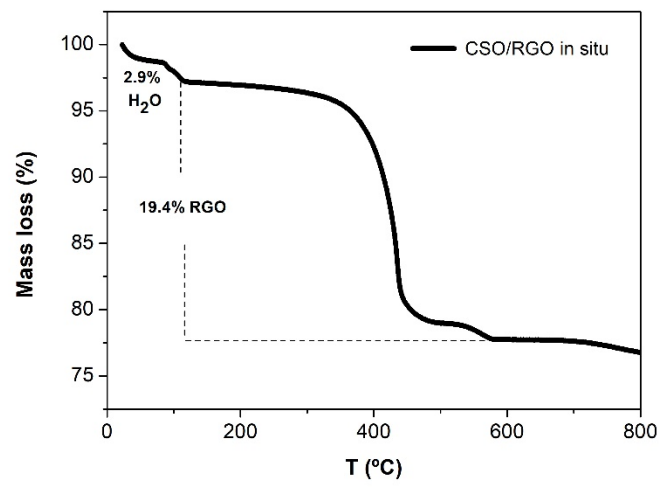

Figure S1. TGA analysis for CSO/RGO *in-situ*.

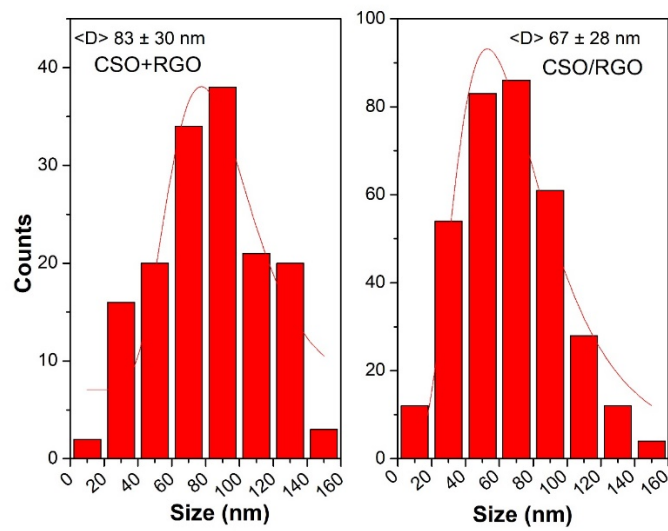

Figure S2. Particle histogram distribution.

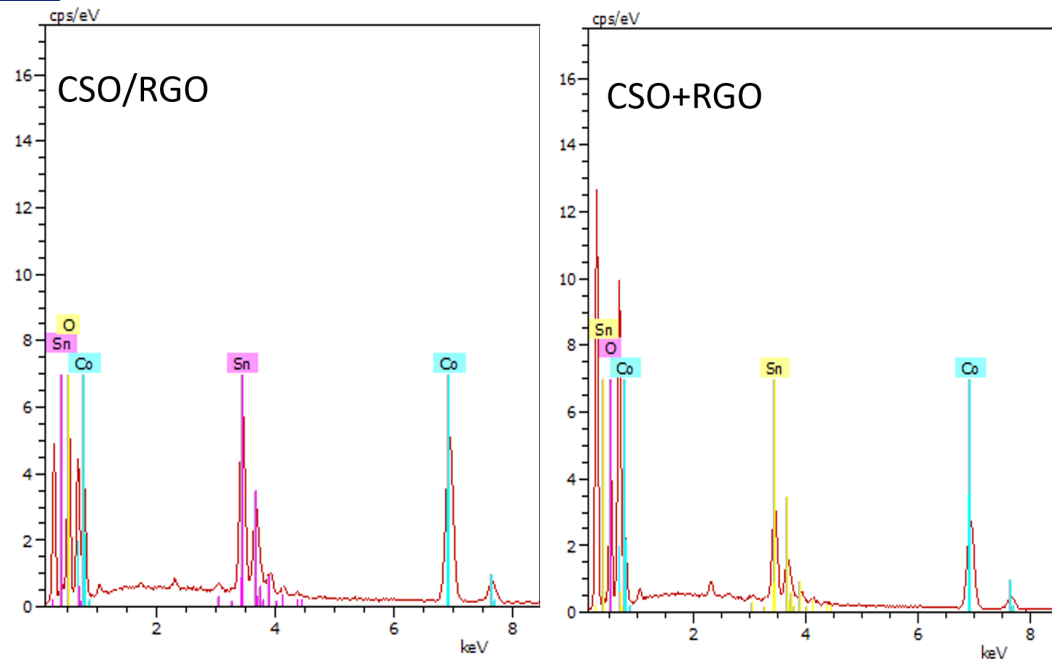

**Figure S3.** EDX spectrum for CSO/RGO and CSO+RGO.

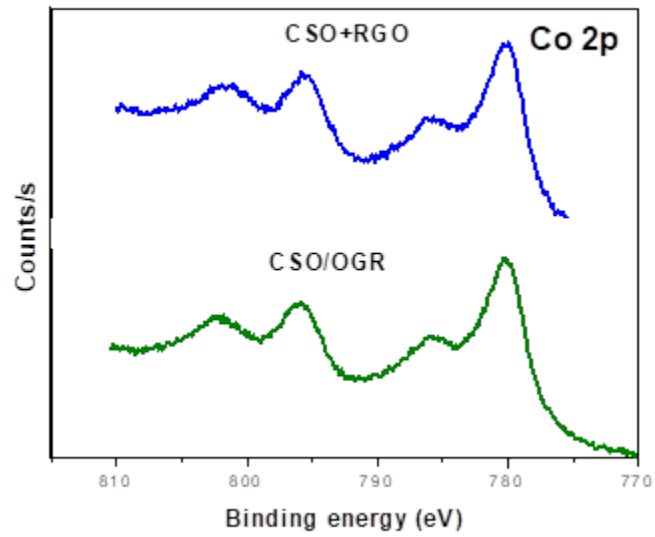

**Figure S4.** Co 2p X-ray photoelectron spectroscopy (XPS) spectra for CSO+RGO and CSO/OGP materials.

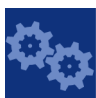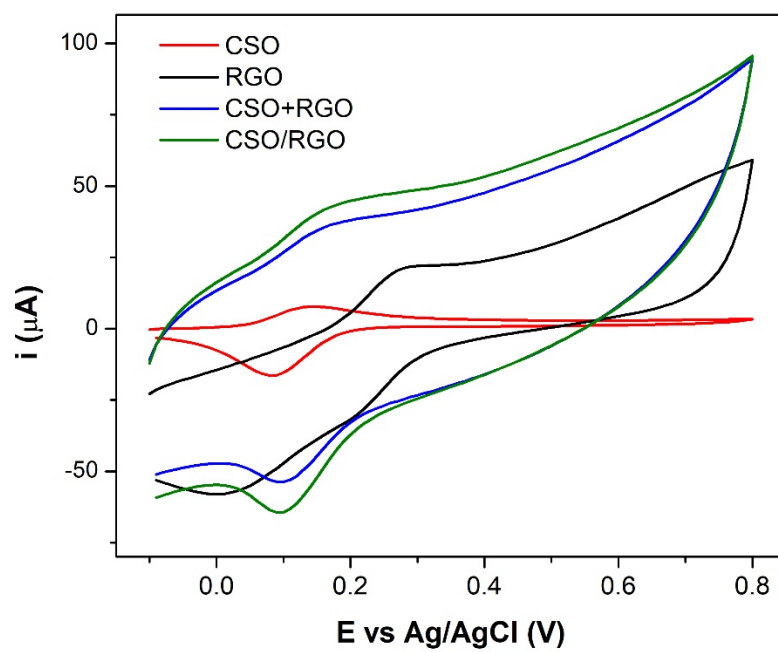

**Figure S5:** Cyclic voltammograms of 0.5 mM ferrocene methanol in PBS pH 7.4 using different modified electrodes.

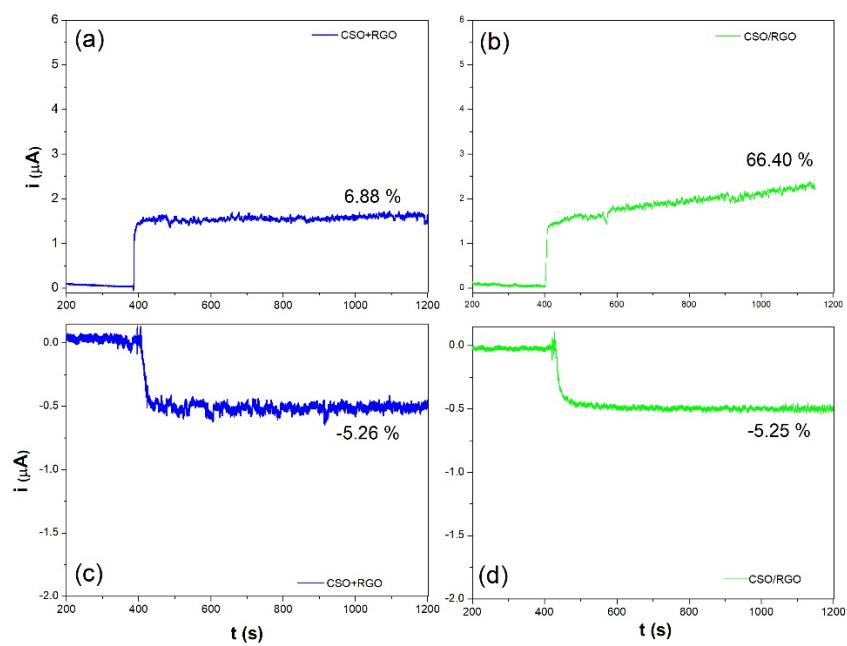

**Figure S6.** Stability of the oxidation response of oxidation of 0.1 mM  $\text{H}_2\text{O}_2$  (a) CSO+RGO and (b) CSO/RGO applying 0.300 V and reduction of 0.1 mM  $\text{H}_2\text{O}_2$  (c) CSO+RGO and (d) CSO/RGO applying -0.400 V.

**Table S1:** Sensing performance comparison of our systems with other sensors using RGO or metallic oxides.

| Electrode                             | Electrolyte | Potential (V) | Sensitivity ( $\mu\text{A mM}^{-1}\text{cm}^{-2}$ ) | LOD ( $\mu\text{M}$ ) | Ref.      |
|---------------------------------------|-------------|---------------|-----------------------------------------------------|-----------------------|-----------|
| $\text{Co}_2\text{TiO}_4/\text{RGO}$  | NaOH (pH12) | −0.400        | 106                                                 | 2.1                   | [1]       |
| $\text{NiCo}_2\text{S}_4/\text{RGO}$  | NaOH (pH13) | −0.450        | 118.5                                               | 0.19                  | [2]       |
| $\text{MnO}_2/\text{MWCNT}$           | PBS (pH7.0) | −0.400        | 13.9                                                | 6.97                  | [3]       |
| $\text{Ni-Fe}_3\text{O}_4@\text{RGO}$ | PBS (pH7.4) | −0.650        | $6 \mu\text{A M}^{-1}$                              | 0.2                   | [4]       |
| $\text{Co}_2\text{SnO}_4/\text{RGO}$  | NaOH (pH12) | −0.400        | 74                                                  | 7.4                   | This work |
| $\text{Co}_2\text{SnO}_4+\text{RGO}$  | NaOH (pH12) | −0.400        | 80                                                  | 7.7                   | This work |

## References

1. Venegas, C.J.; Gutierrez, F.A.; Eguílaz, M.; Marco, J.F.; Reeves-McLaren, N.; Rivas, G.A.; Ruiz-León, D.; Bollo, S.  $\text{Co}_2\text{TiO}_4/\text{Reduced Graphene Oxide}$  Nanohybrids for Electrochemical Sensing Applications. *Nanomaterials* **2019**, *9*, 1–18. <https://doi.org/10.3390/nano9111611>.
2. Wang, M.; Ma, J.; Guan, X.; Peng, W.; Fan, X.; Zhang, G.; Zhang, F.; Li, Y. A Novel  $\text{H}_2\text{O}_2$  Electrochemical Sensor Based on  $\text{NiCo}_2\text{S}_4$  Functionalized Reduced Graphene Oxide. *J. Alloys Compd.* **2019**, *784*, 827–833. <https://doi.org/10.1016/j.jallcom.2019.01.043>.
3. Dinesh, M.; Revathi, C.; Haldorai, Y.; Rajendra Kumar, R.T. Birnessite  $\text{MnO}_2$  Decorated MWCNTs Composite as a Nonenzymatic Hydrogen Peroxide Sensor. *Chem. Phys. Lett.* **2019**, *731*, 136612. <https://doi.org/10.1016/j.cplett.2019.136612>.
4. Kaplan, S.; Suna Karatekin, R.; Kahya Dudukcu, M.; Avci, G. A Novel  $\text{Ni-Fe}_3\text{O}_4@s\text{-RGO}/\text{GCE}$  Electrode for Electrochemical Detection of  $\text{H}_2\text{O}_2$ . *Mater. Chem. Phys.* **2023**, *294*, 127051. <https://doi.org/10.1016/j.matchemphys.2022.127051>.
